# Supplementary material for: An Extended Multilocus Sequence Typing (MLST) Scheme for Rapid Direct Typing of Leptospira from Clinical Samples
Source: PubMed Central journal article supplement (PMC5031427; doi:10.1371/journal.pntd.0004996), 2016-09-21

**S1 Fig. E-gel pictures of PCR products from first round and nested PCRs of selected *Leptospira* strains in different dilutions.**

first round PCR

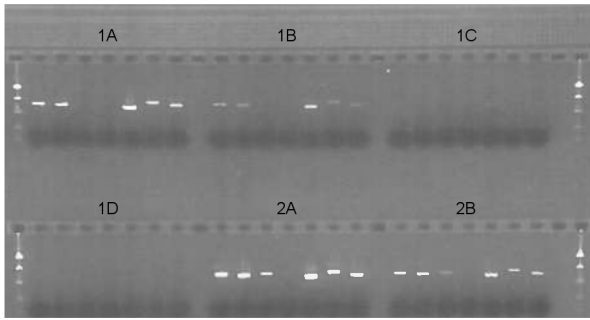

first round PCR

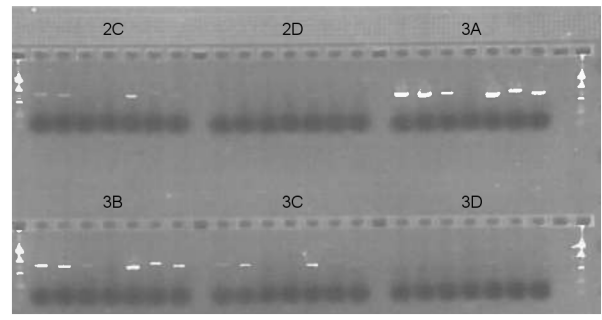

nested PCR

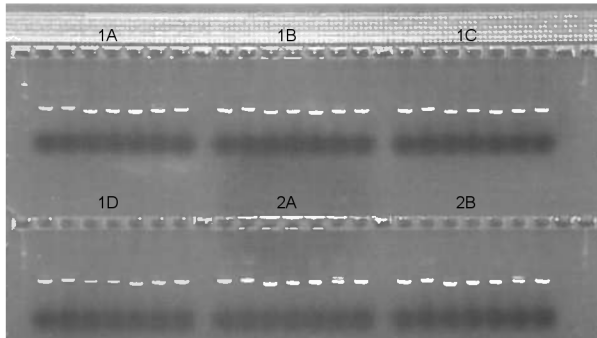

nested PCR

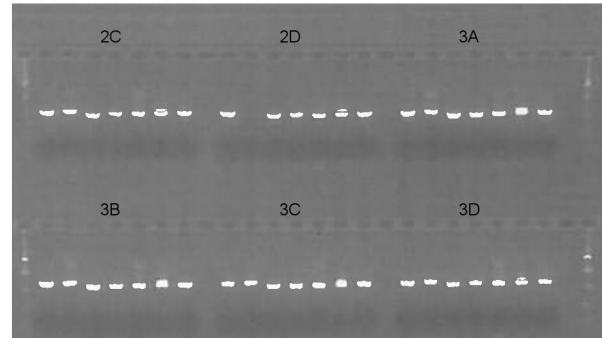

first round PCR

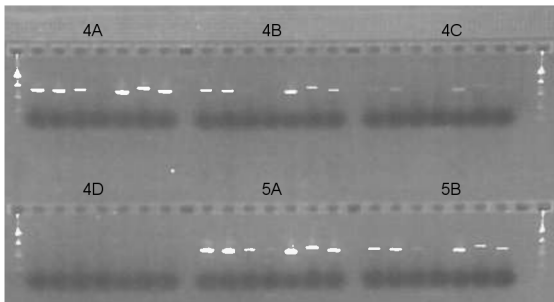

first round PCR

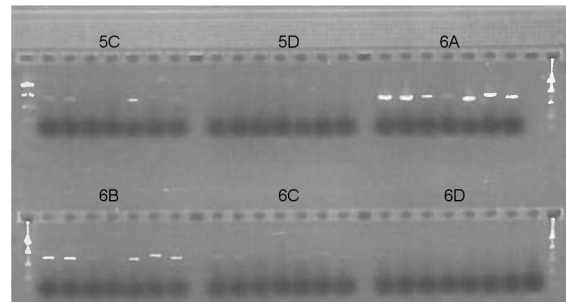

nested PCR

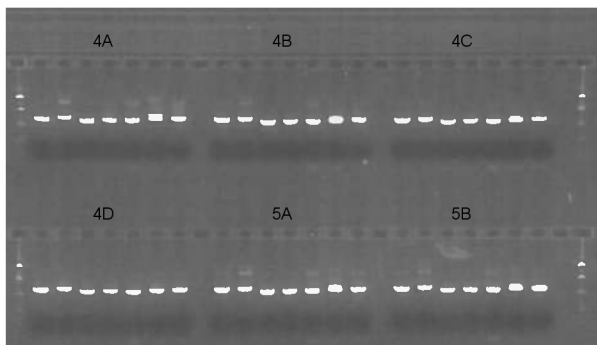

nested PCR

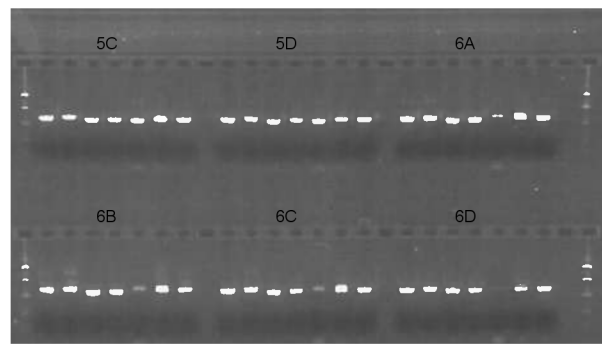

Supplement: pntd.0004996.s004.pdf [file pntd.0004996.s004.pdf]
