# Supplementary material for: An Extended Multilocus Sequence Typing (MLST) Scheme for Rapid Direct Typing of Leptospira from Clinical Samples
Source: PubMed Central journal article supplement (PMC5031427; doi:10.1371/journal.pntd.0004996), 2016-09-21
Supplement: pntd.0004996.s005.pdf [file pntd.0004996.s005.pdf]

S2 Fig. Phylogenetic trees including WHO recommended *Leptospira* serovar panel and clinical samples based on separate alleles.

A – *glmU*

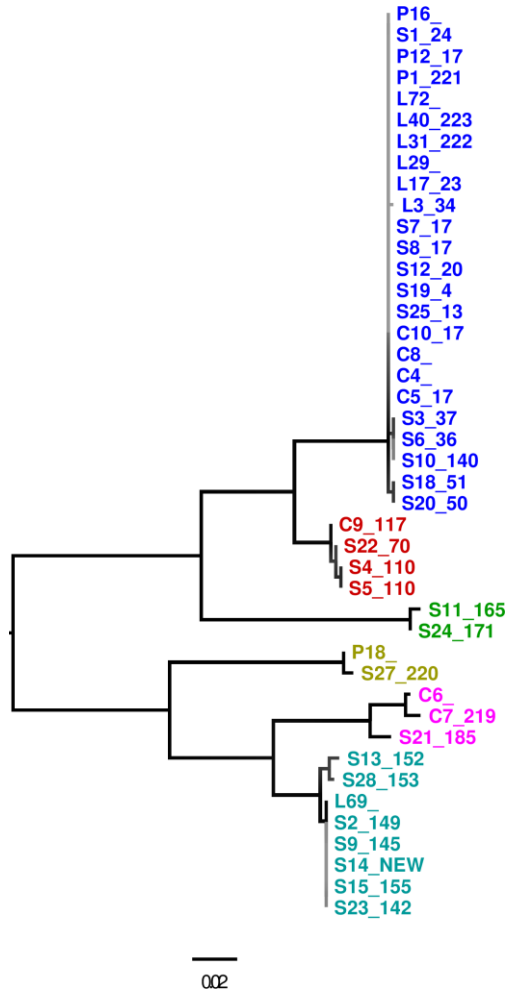

B – *pntA*

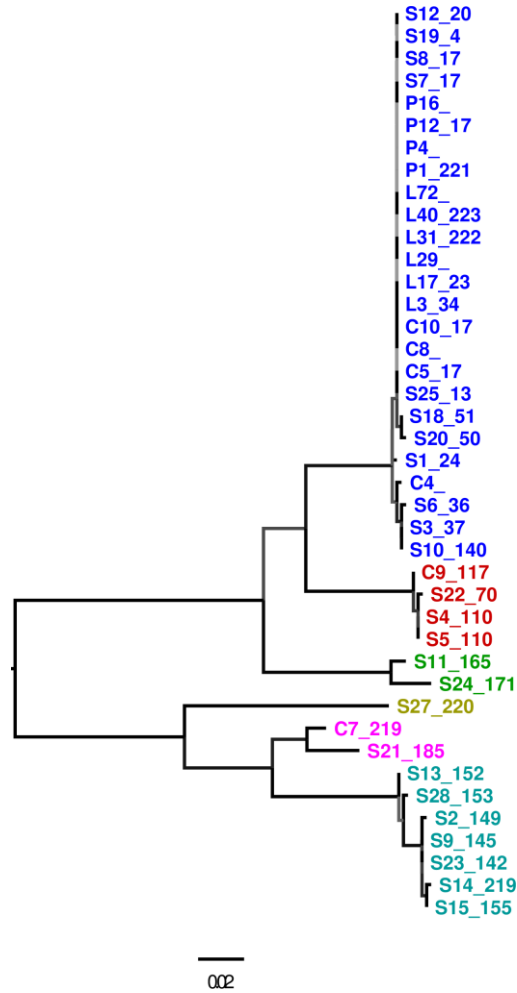

C – *sucA*

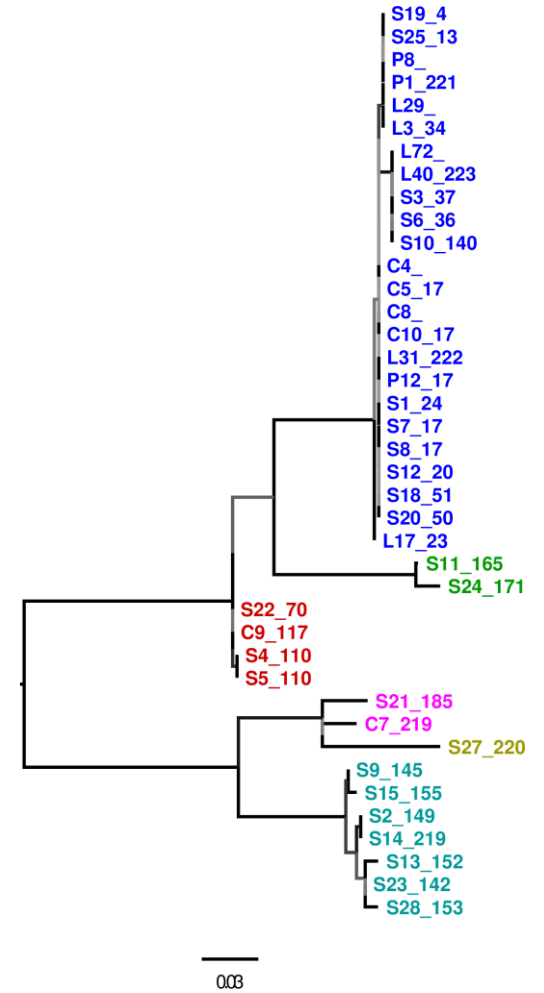

D - *tpiA*

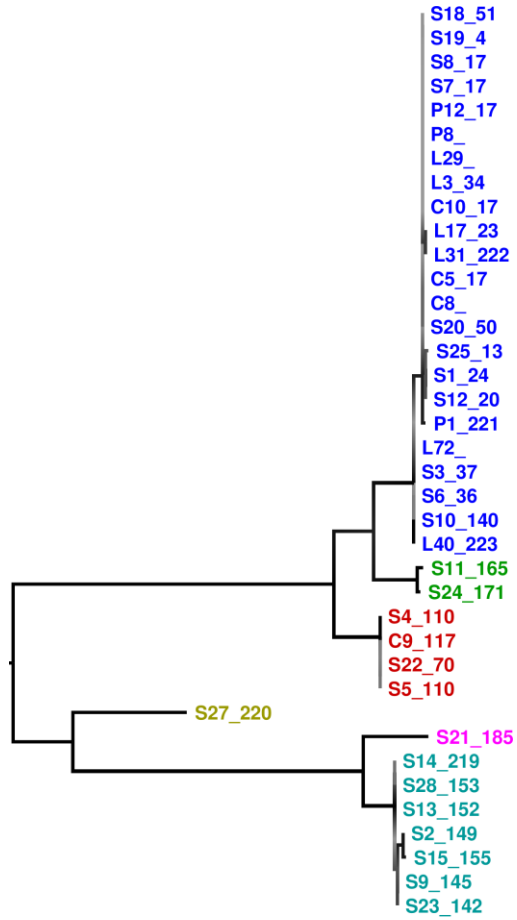

E - *pfkB*

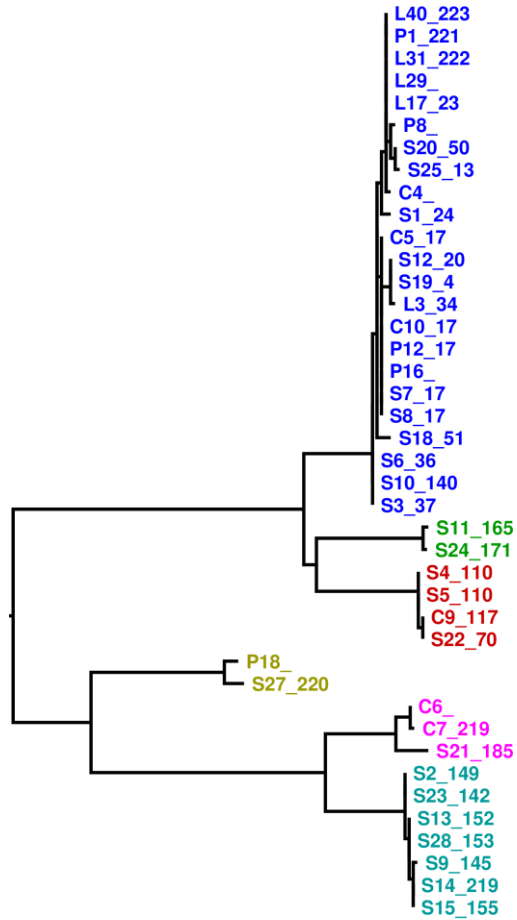

F - *mreA*

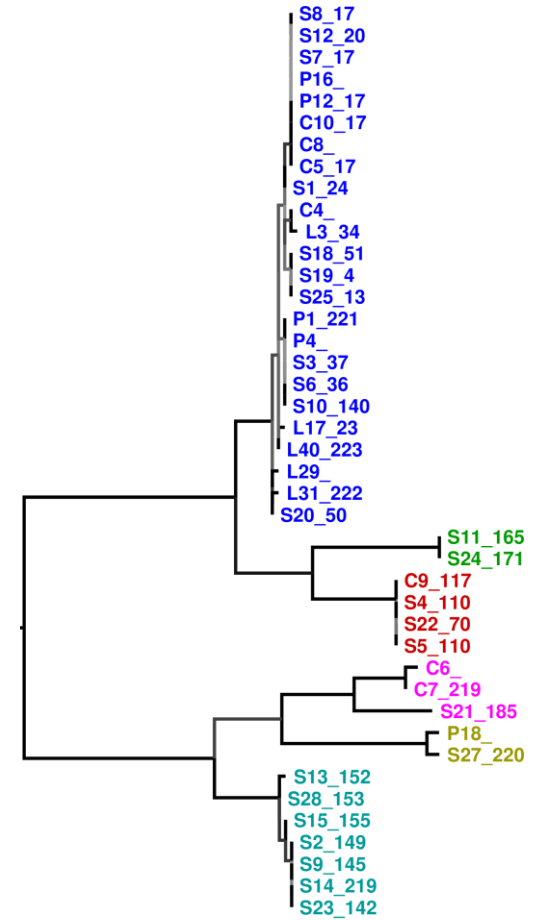

G - *caiB*

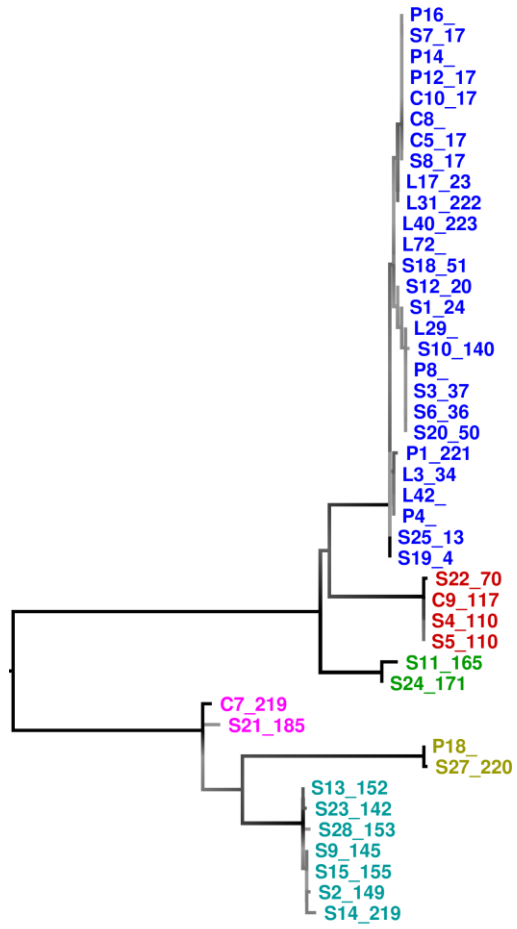

0.03
